# Supplementary material for: Investigating the loess–palaeosol sequence of Bahlingen-Schönenberg (Kaiserstuhl), southwestern Germany, using a multi-methodological approach
Source: Copernicus journal article supplement (doi:10.5194/egqsj-71-145-2022), 2022-08-23
Supplement: Supplementary file 1 [file egqsj-71-145-2022-supplement.zip]

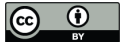

*Supplement of*

**Investigating the loess–palaeosol sequence of Bahlingen-Schönenberg (Kaiserstuhl), southwestern Germany, using a multi-methodological approach**

**Tabea Schulze et al.**

*Correspondence to:* Frank Preusser ([frank.preusser@geologie.uni-freiburg.de](mailto:frank.preusser@geologie.uni-freiburg.de))

- [egqsj-71-145-2022-supplement-title-page.pdf](#)
- [Schulze et al. Bahlingen Supplemental Information 1 Luminescence.docx](#)
- [Schulze et al. Bahlingen Supplemental Information 2 Data in Figure 3.xlsx](#)
- [Schulze et al. Bahlingen Supplemental Information 3 IRSL screening data.xlsx](#)
- [Schulze et al. Bahlingen Supplemental Information 4 kT\\_data.xlsx](#)

The copyright of individual parts of the supplement might differ from the article licence.
